# Supplementary material
Source: PubMed Central journal article supplement (PMC10597427)
Supplement: NEJMoa2209421_data-sharing.pdf [file NEJMoa2209421_data-sharing.pdf]

## Data Sharing Statement

Boulware DR, Lindsell CJ, Stewart TG, et al. Inhaled Fluticasone Furoate for Outpatient Treatment of Covid-19. *N Engl J Med*. DOI: 10.1056/NEJMoa2209421.

| Question                                                            | Authors' Response                                                                                                                                                                                                                                                                                                                 |
|---------------------------------------------------------------------|-----------------------------------------------------------------------------------------------------------------------------------------------------------------------------------------------------------------------------------------------------------------------------------------------------------------------------------|
| Will the data collected for your study be made available to others? | Yes                                                                                                                                                                                                                                                                                                                               |
| Would you like to offer context for your decision?                  | —                                                                                                                                                                                                                                                                                                                                 |
| Which data?                                                         | Complete de-identified patient data set                                                                                                                                                                                                                                                                                           |
| Additional information about data                                   | —                                                                                                                                                                                                                                                                                                                                 |
| How or where can the data be obtained?                              | The data can be obtained from a public repository.                                                                                                                                                                                                                                                                                |
| When will data availability begin?                                  | Data will be deposited in a public repository when the platform trial has concluded.                                                                                                                                                                                                                                              |
| When will data availability end?                                    | —                                                                                                                                                                                                                                                                                                                                 |
| Will any supporting documents be available?                         | —                                                                                                                                                                                                                                                                                                                                 |
| Which supporting documents?                                         | —                                                                                                                                                                                                                                                                                                                                 |
| Additional information about supporting documents                   | —                                                                                                                                                                                                                                                                                                                                 |
| How or where can supporting documents be obtained?                  | —                                                                                                                                                                                                                                                                                                                                 |
| When will supporting documents availability begin?                  | —                                                                                                                                                                                                                                                                                                                                 |
| When will supporting documents availability end?                    | —                                                                                                                                                                                                                                                                                                                                 |
| To whom will data be available?                                     | Prior to deposition of the data in a public repository which will occur when the platform trial has concluded, persons may request the data by submitting a proposal. If the data can be used for the proposed purpose and it is consistent with the informed consent, then the data will be released under a Data Use Agreement. |
| For what type of analysis or purpose?                               | For any purpose consistent with consent provided by participants and for which the data are fit.                                                                                                                                                                                                                                  |
| By what mechanism?                                                  | —                                                                                                                                                                                                                                                                                                                                 |
| Any other restrictions?                                             | —                                                                                                                                                                                                                                                                                                                                 |
| Additional information                                              | —                                                                                                                                                                                                                                                                                                                                 |

This statement was posted on September 21, 2023, at NEJM.org.
