# Supplementary material
Source: PubMed Central journal article supplement (PMC10597427)
Supplement: NEJMoa2209421_disclosures.pdf [file NEJMoa2209421_disclosures.pdf]

Stacey Adam

**Discloser Identifier:** 1088380

**Disclosure Purpose:** 22-09421

## Summary of Interests

I do not have any interests to disclose at this time.

## Additional Questions

1. **Are there other relationships or activities that readers could perceive to have influenced, or that give the appearance of potentially influencing, what you wrote in the submitted work?**

No.

2. **What is the manuscript title?**

Inhaled Fluticasone for Outpatient Treatment of Covid-19

3. **Are you the corresponding author?**

No.

## Certification

I certify that the information provided in this disclosure is complete and accurate.

David Boulware

**Discloser Identifier:** 360309

**Disclosure Purpose:** 22-09421

## Summary of Interests

I do not have any interests to disclose at this time.

## Additional Questions

1. **Are there other relationships or activities that readers could perceive to have influenced, or that give the appearance of potentially influencing, what you wrote in the submitted work?**

No.

2. **What is the manuscript title?**

Inhaled Fluticasone for Outpatient Treatment of Covid-19

3. **Are you the corresponding author?**

No.

## Certification

I certify that the information provided in this disclosure is complete and accurate.

Discloser Identifier: 971690

Disclosure Purpose: 22-09421

## Summary of Interests

### Company or Organization

| Entity                                                                                                                                                                                                                                                                                                                                             | Type             | Interest Held By |
|----------------------------------------------------------------------------------------------------------------------------------------------------------------------------------------------------------------------------------------------------------------------------------------------------------------------------------------------------|------------------|------------------|
| Arrowhead Pharmaceuticals                                                                                                                                                                                                                                                                                                                          | Consultant       | Self             |
| Category: Consultant<br>Description:<br>Additional Information:                                                                                                                                                                                                                                                                                    |                  |                  |
| AstraZeneca                                                                                                                                                                                                                                                                                                                                        | Grant / Contract | Self             |
| Recipient Name: University of Kansas School of Medicine<br>Grant / Contract Description:<br>Additional Information: <span style="float: right;">                         Recipient Type: Institution<br/>                         Grant / Contract Purpose: Research                     </span>                                                   |                  |                  |
| AstraZeneca                                                                                                                                                                                                                                                                                                                                        | Other            | Self             |
| Category: Other<br>Description: Speaking engagements on disease state<br>Additional Information: Speaking engagements on disease state, University Grant funding                                                                                                                                                                                   |                  |                  |
| GALATHERAPEUTICS                                                                                                                                                                                                                                                                                                                                   | Grant / Contract | Self             |
| Recipient Name: University of Kansas School of Medicine<br>Grant / Contract Description:<br>Additional Information: <span style="float: right;">                         Recipient Type: Institution<br/>                         Grant / Contract Purpose: Research                     </span>                                                   |                  |                  |
| Genentech                                                                                                                                                                                                                                                                                                                                          | Other            | Self             |
| Category: Other<br>Description: Speaking engagements on disease state, Consulting fees<br>Additional Information:                                                                                                                                                                                                                                  |                  |                  |
| MedLearningGroup                                                                                                                                                                                                                                                                                                                                   | Other            | Self             |
| Category: Other<br>Description: Speaker, unbranded programs<br>Additional Information:                                                                                                                                                                                                                                                             |                  |                  |
| Novartis                                                                                                                                                                                                                                                                                                                                           | Grant / Contract | Self             |
| Recipient Name: University of Kansas School of Medicine<br>Grant / Contract Description: University grant funding<br>Additional Information: University grant funding <span style="float: right;">                         Recipient Type: Institution<br/>                         Grant / Contract Purpose: Research                     </span> |                  |                  |
| OM Pharma                                                                                                                                                                                                                                                                                                                                          | Consultant       | Self             |
| Category: Consultant<br>Description:<br>Additional Information:                                                                                                                                                                                                                                                                                    |                  |                  |

| Entity                                                                                                                                                                                                                                                                        | Type             | Interest Held By |
|-------------------------------------------------------------------------------------------------------------------------------------------------------------------------------------------------------------------------------------------------------------------------------|------------------|------------------|
| Pioneering Medicines                                                                                                                                                                                                                                                          | Consultant       | Self             |
| <i>Category:</i> Consultant<br><i>Description:</i><br><i>Additional Information:</i>                                                                                                                                                                                          |                  |                  |
| Pulmatrix                                                                                                                                                                                                                                                                     | Grant / Contract | Self             |
| <i>Recipient Name:</i> University of Kansas School of Medicine<br><i>Grant / Contract Description:</i> University grant funding<br><i>Additional Information:</i> University grant funding<br><i>Recipient Type:</i> Institution<br><i>Grant / Contract Purpose:</i> Research |                  |                  |
| Regeneron Pharmaceuticals                                                                                                                                                                                                                                                     | Other            | Self             |
| <i>Category:</i> Other<br><i>Description:</i> Speaking engagements on disease state<br><i>Additional Information:</i>                                                                                                                                                         |                  |                  |
| Regeneron Pharmaceuticals, Inc.                                                                                                                                                                                                                                               | Grant / Contract | Self             |
| <i>Recipient Name:</i> University of Kansas School of Medicine<br><i>Grant / Contract Description:</i> University Grand Funding<br><i>Additional Information:</i><br><i>Recipient Type:</i> Institution<br><i>Grant / Contract Purpose:</i> Research                          |                  |                  |
| SANOFI US SERVICES INC.                                                                                                                                                                                                                                                       | Grant / Contract | Self             |
| <i>Recipient Name:</i> University of Kansas School of Medicine<br><i>Grant / Contract Description:</i><br><i>Additional Information:</i><br><i>Recipient Type:</i> Institution<br><i>Grant / Contract Purpose:</i> Research                                                   |                  |                  |
| SANOFI US SERVICES INC.                                                                                                                                                                                                                                                       | Other            | Self             |
| <i>Category:</i> Other<br><i>Description:</i> Speaking engagements on disease state, consulting<br><i>Additional Information:</i>                                                                                                                                             |                  |                  |
| Teva Pharmaceutical Industries                                                                                                                                                                                                                                                | Other            | Self             |
| <i>Category:</i> Other<br><i>Description:</i> Speaking engagements on disease state<br><i>Additional Information:</i>                                                                                                                                                         |                  |                  |
| Theravance Biopharma Inc.                                                                                                                                                                                                                                                     | Grant / Contract | Self             |
| <i>Recipient Name:</i> University of Kansas School of Medicine<br><i>Grant / Contract Description:</i><br><i>Additional Information:</i><br><i>Recipient Type:</i> Institution<br><i>Grant / Contract Purpose:</i> Research                                                   |                  |                  |
| Theravance Biopharma Inc.                                                                                                                                                                                                                                                     | Other            | Self             |
| <i>Category:</i> Other<br><i>Description:</i> Speaker for unbranded programs<br><i>Additional Information:</i>                                                                                                                                                                |                  |                  |

## Intellectual Property

| Type                                                   | Is Licensed | Interest Held By |
|--------------------------------------------------------|-------------|------------------|
| Copyright - Royalties from books, under \$500USD/annum | -           | Self             |

| Type                                                                                                                                                                   | Is Licensed | Interest Held By                                               |
|------------------------------------------------------------------------------------------------------------------------------------------------------------------------|-------------|----------------------------------------------------------------|
| <i>Description:</i> Royalties from books, under \$500USD/annum<br><i>Filing Jurisdiction:</i> USA<br><i>Licensees:</i><br><i>Additional Information:</i> Book chapters |             | <i>Copyright Number:</i><br><i>Copyright Holder:</i> Discloser |

## Additional Questions

1. **Are there other relationships or activities that readers could perceive to have influenced, or that give the appearance of potentially influencing, what you wrote in the submitted work?**

No.

2. **What is the manuscript title?**

Inhaled Fluticasone for Outpatient Treatment of Covid-19

3. **Are you the corresponding author?**

No.

## Certification

I certify that the information provided in this disclosure is complete and accurate.

Sean Collins

Discloser Identifier: 972237

Disclosure Purpose: 22-09421

## Summary of Interests

### Company or Organization

| Entity                                                                                                                                                                                                                   | Type             | Interest Held By |
|--------------------------------------------------------------------------------------------------------------------------------------------------------------------------------------------------------------------------|------------------|------------------|
| Enanta                                                                                                                                                                                                                   | Consultant       | Self             |
| <i>Category:</i> Consultant<br><i>Description:</i><br><i>Additional Information:</i>                                                                                                                                     |                  |                  |
| National Center for Advancing Translational Sciences                                                                                                                                                                     | Grant / Contract | Self             |
| <i>Recipient Name:</i> Vanderbilt University Medical Center<br><i>Grant / Contract Description:</i><br><i>Additional Information:</i><br><i>Recipient Type:</i> Institution<br><i>Grant / Contract Purpose:</i> Research |                  |                  |
| National Heart, Lung, and Blood Institute                                                                                                                                                                                | Grant / Contract | Self             |
| <i>Recipient Name:</i> Vanderbilt University Medical Center<br><i>Grant / Contract Description:</i><br><i>Additional Information:</i><br><i>Recipient Type:</i> Institution<br><i>Grant / Contract Purpose:</i> Research |                  |                  |
| vir biotechnology                                                                                                                                                                                                        | Consultant       | Self             |
| <i>Category:</i> Consultant<br><i>Description:</i><br><i>Additional Information:</i>                                                                                                                                     |                  |                  |

## Additional Questions

1. **Are there other relationships or activities that readers could perceive to have influenced, or that give the appearance of potentially influencing, what you wrote in the submitted work?**

No.

2. **What is the manuscript title?**

Inhaled Fluticasone for Outpatient Treatment of Covid-19: A Decentralized, Placebo-controlled, Randomized, Platform Clinical Trial

3. **Are you the corresponding author?**

No.

## Certification

I certify that the information provided in this disclosure is complete and accurate.



Allison DeLong

**Discloser Identifier:** 1088382

**Disclosure Purpose:** 22-09421

## Summary of Interests

I do not have any interests to disclose at this time.

## Additional Questions

1. **Are there other relationships or activities that readers could perceive to have influenced, or that give the appearance of potentially influencing, what you wrote in the submitted work?**

No.

2. **What is the manuscript title?**

Inhaled Fluticasone for Outpatient Treatment of Covid-19: A Decentralized, Placebo-controlled, Randomized, Platform Clinical Trial

3. **Are you the corresponding author?**

No.

## Certification

I certify that the information provided in this disclosure is complete and accurate.



Sarah Dunsmore

**Discloser Identifier:** 1088378

**Disclosure Purpose:** 22-09421

## Summary of Interests

I do not have any interests to disclose at this time.

## Additional Questions

1. **Are there other relationships or activities that readers could perceive to have influenced, or that give the appearance of potentially influencing, what you wrote in the submitted work?**

No.

2. **What is the manuscript title?**

Inhaled Fluticasone for Outpatient Treatment of Covid-19: A Decentralized, Placebo-controlled, Randomized, Platform Clinical Trial

3. **Are you the corresponding author?**

No.

## Certification

I certify that the information provided in this disclosure is complete and accurate.

Gary Felker

**Discloser Identifier:** 441772

**Disclosure Purpose:** 22-09421

## Summary of Interests

I do not have any interests to disclose at this time.

## Additional Questions

1. **Are there other relationships or activities that readers could perceive to have influenced, or that give the appearance of potentially influencing, what you wrote in the submitted work?**

No.

2. **What is the manuscript title?**

Inhaled Fluticasone for Outpatient Treatment of Covid-19: A Decentralized, Placebo-controlled, Randomized, Platform Clinical Trial

3. **Are you the corresponding author?**

No.

## Certification

I certify that the information provided in this disclosure is complete and accurate.

Nina Gentile

**Discloser Identifier:** 1088376

**Disclosure Purpose:** 22-09421

## Summary of Interests

I do not have any interests to disclose at this time.

## Additional Questions

1. **Are there other relationships or activities that readers could perceive to have influenced, or that give the appearance of potentially influencing, what you wrote in the submitted work?**

No.

2. **What is the manuscript title?**

"Inhaled Fluticasone for Outpatient Treatment of Covid-19"

3. **Are you the corresponding author?**

No.

## Certification

I certify that the information provided in this disclosure is complete and accurate.

# Adit Ginde

**Discloser Identifier:** 972239

**Disclosure Purpose:** 22-09421

## Summary of Interests

### Company or Organization

| Entity                                                                                                                                                                                                      | Type             | Interest Held By |
|-------------------------------------------------------------------------------------------------------------------------------------------------------------------------------------------------------------|------------------|------------------|
| AbbVie                                                                                                                                                                                                      | Grant / Contract | Self             |
| <i>Recipient Name:</i> Adit Ginde<br><i>Grant / Contract Description:</i> Investigator initiated research grant for COVID-19 outpatient trial, outside the submitted work<br><i>Additional Information:</i> |                  |                  |
| <i>Recipient Type:</i> Institution<br><i>Grant / Contract Purpose:</i> Research                                                                                                                             |                  |                  |
| Faron Pharmaceuticals                                                                                                                                                                                       | Grant / Contract | Self             |
| <i>Recipient Name:</i> Adit Ginde<br><i>Grant / Contract Description:</i> Investigator initiated research grant for COVID-19 inpatient trial, outside the submitted work<br><i>Additional Information:</i>  |                  |                  |
| <i>Recipient Type:</i> Institution<br><i>Grant / Contract Purpose:</i> Research                                                                                                                             |                  |                  |

## Additional Questions

1. **Are there other relationships or activities that readers could perceive to have influenced, or that give the appearance of potentially influencing, what you wrote in the submitted work?**

No.

2. **What is the manuscript title?**

Inhaled Fluticasone for Outpatient Treatment of Covid-19

3. **Are you the corresponding author?**

No.

## Certification

I certify that the information provided in this disclosure is complete and accurate.

George Hanna

**Discloser Identifier:** 1088383

**Disclosure Purpose:** 22-09421

## Summary of Interests

### Company or Organization

| Entity                                                                                                                                                                                                                                                                                                                                                                       | Type       | Interest Held By |
|------------------------------------------------------------------------------------------------------------------------------------------------------------------------------------------------------------------------------------------------------------------------------------------------------------------------------------------------------------------------------|------------|------------------|
| AbPro                                                                                                                                                                                                                                                                                                                                                                        | Consultant | Self             |
| <i>Category:</i> Consultant<br><i>Description:</i> Infectious Diseases Scientific Advisory Board<br><i>Additional Information:</i>                                                                                                                                                                                                                                           |            |                  |
| Bristol-Myers Squibb                                                                                                                                                                                                                                                                                                                                                         | Stock      | Self             |
| <i>Additional Information:</i>                                                                                                                                                                                                                                                                                                                                               |            |                  |
| Merck                                                                                                                                                                                                                                                                                                                                                                        | Stock      | Self             |
| <i>Additional Information:</i>                                                                                                                                                                                                                                                                                                                                               |            |                  |
| Tunnell Government Services                                                                                                                                                                                                                                                                                                                                                  | Employment | Self             |
| <i>Title:</i> Clinical Subject Matter Expert Supporting BARDA<br><i>Position Description:</i> Subject matter expert in clinical development supporting BARDA<br><i>Additional Information:</i> Supporting US Department of Health and Human Services, Administration for Strategic Preparedness and Response, Biomedical Advanced Research and Development Authority (BARDA) |            |                  |

## Additional Questions

1. **Are there other relationships or activities that readers could perceive to have influenced, or that give the appearance of potentially influencing, what you wrote in the submitted work?**

No.

2. **What is the manuscript title?**

Inhaled Fluticasone for Outpatient Treatment of Covid-19: A Decentralized, Placebo-controlled, Randomized, Platform Clinical Trial

3. **Are you the corresponding author?**

No.

## Certification

I certify that the information provided in this disclosure is complete and accurate.



Discloser Identifier: 465148

Disclosure Purpose: 22-09421

## Summary of Interests

### Company or Organization

| Entity                                                                                                                                                               | Type             | Interest Held By                                                                |
|----------------------------------------------------------------------------------------------------------------------------------------------------------------------|------------------|---------------------------------------------------------------------------------|
| American Regent                                                                                                                                                      | Grant / Contract | Self                                                                            |
| <i>Recipient Name:</i> Duke University<br><i>Grant / Contract Description:</i> Clinical Trials<br><i>Additional Information:</i> HEART-FID                           |                  | <i>Recipient Type:</i> Institution<br><i>Grant / Contract Purpose:</i> Research |
| American Regent                                                                                                                                                      | Grant / Contract | Self                                                                            |
| <i>Recipient Name:</i> Duke University<br><i>Grant / Contract Description:</i> Clinical trial grant-HEARTFID<br><i>Additional Information:</i>                       |                  | <i>Recipient Type:</i> Institution<br><i>Grant / Contract Purpose:</i> Research |
| Amgen                                                                                                                                                                | Consultant       | Self                                                                            |
| <i>Category:</i> Consultant<br><i>Description:</i> Heart failure consultant<br><i>Additional Information:</i>                                                        |                  |                                                                                 |
| AstraZeneca                                                                                                                                                          | Grant / Contract | Self                                                                            |
| <i>Recipient Name:</i> Duke University<br><i>Grant / Contract Description:</i> Clinical Trial<br><i>Additional Information:</i>                                      |                  | <i>Recipient Type:</i> Institution<br><i>Grant / Contract Purpose:</i> Research |
| AstraZeneca                                                                                                                                                          | Consultant       | Self                                                                            |
| <i>Category:</i> Consultant<br><i>Description:</i> Heart failure; diabetes<br><i>Additional Information:</i>                                                         |                  |                                                                                 |
| Bayer                                                                                                                                                                | Grant / Contract | Self                                                                            |
| <i>Recipient Name:</i> Duke Clinical Research Institute<br><i>Grant / Contract Description:</i><br><i>Additional Information:</i>                                    |                  | <i>Recipient Type:</i> Institution<br><i>Grant / Contract Purpose:</i> Research |
| Bayer                                                                                                                                                                | Consultant       | Self                                                                            |
| <i>Category:</i> Consultant<br><i>Description:</i> heart failure<br><i>Additional Information:</i>                                                                   |                  |                                                                                 |
| Boehringer Ingelheim                                                                                                                                                 | Grant / Contract | Self                                                                            |
| <i>Recipient Name:</i> Duke University<br><i>Grant / Contract Description:</i> clinical trial<br><i>Additional Information:</i> Research Grant to DCRI for EMPCAT-MI |                  | <i>Recipient Type:</i> Institution<br><i>Grant / Contract Purpose:</i> Research |

| Entity                                                                                                                          | Type                       | Interest Held By                                                                                 |
|---------------------------------------------------------------------------------------------------------------------------------|----------------------------|--------------------------------------------------------------------------------------------------|
| Boehringer Ingelheim                                                                                                            | Consultant                 | Self                                                                                             |
| <i>Category:</i> Consultant<br><i>Description:</i> consultant<br><i>Additional Information:</i>                                 |                            |                                                                                                  |
| Boston Scientific Corporation                                                                                                   | Consultant                 | Self                                                                                             |
| <i>Category:</i> Consultant<br><i>Description:</i> heart failure<br><i>Additional Information:</i>                              |                            |                                                                                                  |
| CSL Behring                                                                                                                     | Consultant                 | Self                                                                                             |
| <i>Category:</i> Consultant<br><i>Description:</i> atherosclerosis<br><i>Additional Information:</i>                            |                            |                                                                                                  |
| Cytokinetics                                                                                                                    | Consultant                 | Self                                                                                             |
| <i>Category:</i> Consultant<br><i>Description:</i> heart failure<br><i>Additional Information:</i>                              |                            |                                                                                                  |
| Duke Clinical Research Institute                                                                                                | Employment                 | Self                                                                                             |
| <i>Title:</i> Executive Director; Vice Dean of Duke School of Medicine<br><i>Additional Information:</i>                        |                            | <i>Position Description:</i> Oversee the DCRI and part of the Duke School of Medicine Leadership |
| Eidos                                                                                                                           | Data And Safety Monitoring | Self                                                                                             |
| <i>Category:</i> Data And Safety Monitoring<br><i>Description:</i> amyloid trial<br><i>Additional Information:</i>              |                            |                                                                                                  |
| Eli Lilly and Company                                                                                                           | Consultant                 | Self                                                                                             |
| <i>Category:</i> Consultant<br><i>Description:</i> Heart failure/diabetes<br><i>Additional Information:</i>                     |                            |                                                                                                  |
| FibroGen                                                                                                                        | Consultant                 | Self                                                                                             |
| <i>Category:</i> Consultant<br><i>Description:</i> FDA mock panel<br><i>Additional Information:</i>                             |                            |                                                                                                  |
| Intercept Pharmaceuticals, Inc.                                                                                                 | Data And Safety Monitoring | Self                                                                                             |
| <i>Category:</i> Data And Safety Monitoring<br><i>Description:</i> NASH<br><i>Additional Information:</i>                       |                            |                                                                                                  |
| Merck                                                                                                                           | Grant / Contract           | Self                                                                                             |
| <i>Recipient Name:</i> Duke University<br><i>Grant / Contract Description:</i> VICTORIA trial<br><i>Additional Information:</i> |                            | <i>Recipient Type:</i> Institution<br><i>Grant / Contract Purpose:</i> Research                  |
| Merck                                                                                                                           | Consultant                 | Self                                                                                             |



| Entity                                                                                                                                           | Type             | Interest Held By |
|--------------------------------------------------------------------------------------------------------------------------------------------------|------------------|------------------|
| <i>Category:</i> Consultant<br><i>Description:</i> heart failure<br><i>Additional Information:</i>                                               |                  |                  |
| Novartis                                                                                                                                         | Grant / Contract | Self             |
| <i>Recipient Name:</i> Duke University<br><i>Grant / Contract Description:</i> CONNECT-HF; PARAGLIDe<br><i>Additional Information:</i>           |                  |                  |
| <i>Recipient Type:</i> Institution<br><i>Grant / Contract Purpose:</i> Research                                                                  |                  |                  |
| Novartis                                                                                                                                         | Consultant       | Self             |
| <i>Category:</i> Consultant<br><i>Description:</i> HF and atherosclerosis<br><i>Additional Information:</i>                                      |                  |                  |
| Novo Nordisk                                                                                                                                     | Consultant       | Self             |
| <i>Category:</i> Consultant<br><i>Description:</i> Consultant on pragmatic clinical trials<br><i>Additional Information:</i>                     |                  |                  |
| Relypsa, Inc.                                                                                                                                    | Consultant       | Self             |
| <i>Category:</i> Consultant<br><i>Description:</i> hyperkalemia<br><i>Additional Information:</i>                                                |                  |                  |
| Verily                                                                                                                                           | Grant / Contract | Self             |
| <i>Recipient Name:</i> Duke University<br><i>Grant / Contract Description:</i> Project Baseline Research Grant<br><i>Additional Information:</i> |                  |                  |
| <i>Recipient Type:</i> Institution<br><i>Grant / Contract Purpose:</i> Research                                                                  |                  |                  |

## Additional Questions

1. **Are there other relationships or activities that readers could perceive to have influenced, or that give the appearance of potentially influencing, what you wrote in the submitted work?**

No.

2. **What is the manuscript title?**

Inhaled Fluticasone for Outpatient Treatment of Covid-19: A Decentralized, Placebo-controlled, Randomized, Platform Clinical Trial

3. **Are you the corresponding author?**

No.

## Certification

I certify that the information provided in this disclosure is complete and accurate.



dushyantha jayaweera

**Discloser Identifier:** 482763

**Disclosure Purpose:** 22-09421

## Summary of Interests

### Company or Organization

| Entity                                                                                                                | Type       | Interest Held By |
|-----------------------------------------------------------------------------------------------------------------------|------------|------------------|
| Theratechnologies Inc.                                                                                                | Consultant | Self             |
| <i>Category:</i> Consultant<br><i>Description:</i> scientific committee<br><i>Additional Information:</i> hourly rate |            |                  |

## Additional Questions

**1. Are there other relationships or activities that readers could perceive to have influenced, or that give the appearance of potentially influencing, what you wrote in the submitted work?**

No.

**2. What is the manuscript title?**

Inhaled Fluticasone for Outpatient Treatment of Covid-19: A Decentralized, Placebo-controlled, Randomized, Platform Clinical Trial"

**3. Are you the corresponding author?**

No.

## Certification

I certify that the information provided in this disclosure is complete and accurate.

# Christopher Lindsell

**Discloser Identifier:** 877166

**Disclosure Purpose:** 22-09421

## Summary of Interests

### Company or Organization

| Entity                                                                                                                                    | Type         | Interest Held By |
|-------------------------------------------------------------------------------------------------------------------------------------------|--------------|------------------|
| Bioscape Digital                                                                                                                          | Stock Option | Self             |
| Additional Information: Stock options valued at \$5,000 at the time of granting, with a ten year option period. The expiration is in 2023 |              |                  |

## Additional Questions

1. **Are there other relationships or activities that readers could perceive to have influenced, or that give the appearance of potentially influencing, what you wrote in the submitted work?**

No.

2. **What is the manuscript title?**

Fluvoxamine for Outpatient Treatment of COVID-19: A Decentralized, Placebo-controlled, Randomized, Platform Clinical Trial

3. **Are you the corresponding author?**

No.

## Certification

I certify that the information provided in this disclosure is complete and accurate.

Matthew McCarthy

**Discloser Identifier:** 1088375

**Disclosure Purpose:** 22-09421

## Summary of Interests

I do not have any interests to disclose at this time.

## Additional Questions

1. **Are there other relationships or activities that readers could perceive to have influenced, or that give the appearance of potentially influencing, what you wrote in the submitted work?**

No.

2. **What is the manuscript title?**

Inhaled Fluticasone for Outpatient Treatment of Covid-19

3. **Are you the corresponding author?**

No.

## Certification

I certify that the information provided in this disclosure is complete and accurate.

Kathleen McTigue

Discloser Identifier: 505553

Disclosure Purpose: 22-09421

## Summary of Interests

### Company or Organization

| Entity                                                                                           | Type             | Interest Held By                                           |
|--------------------------------------------------------------------------------------------------|------------------|------------------------------------------------------------|
| American Heart Association                                                                       | Grant / Contract | Self                                                       |
| <i>Recipient Name:</i><br><i>Grant / Contract Description:</i><br><i>Additional Information:</i> |                  | <i>Recipient Type:</i><br><i>Grant / Contract Purpose:</i> |
| Janssen Pharmaceuticals                                                                          | Grant / Contract | Self                                                       |
| <i>Recipient Name:</i><br><i>Grant / Contract Description:</i><br><i>Additional Information:</i> |                  | <i>Recipient Type:</i><br><i>Grant / Contract Purpose:</i> |
| Pfizer                                                                                           | Grant / Contract | Self                                                       |
| <i>Recipient Name:</i><br><i>Grant / Contract Description:</i><br><i>Additional Information:</i> |                  | <i>Recipient Type:</i><br><i>Grant / Contract Purpose:</i> |

## Additional Questions

1. Are there other relationships or activities that readers could perceive to have influenced, or that give the appearance of potentially influencing, what you wrote in the submitted work?

No.

2. What is the manuscript title?

Inhaled Fluticasone for Outpatient Treatment of Covid-19

3. Are you the corresponding author?

No.

## Certification

I certify that the information provided in this disclosure is complete and accurate.



Discloser Identifier: 603891

Disclosure Purpose: 22-09421

## Summary of Interests

### Company or Organization

| Entity                                                                                                          | Type                       | Interest Held By                                                       |
|-----------------------------------------------------------------------------------------------------------------|----------------------------|------------------------------------------------------------------------|
| AbbVie                                                                                                          | Grant / Contract           | Self                                                                   |
| <i>Recipient Name:</i> Susanna Naggie<br><i>Grant / Contract Description:</i><br><i>Additional Information:</i> |                            | <i>Recipient Type:</i> Institution<br><i>Grant / Contract Purpose:</i> |
| Bristol Myers Squibb Company                                                                                    | End Point Review Committee | Self                                                                   |
| <i>Category:</i> End Point Review Committee<br><i>Description:</i><br><i>Additional Information:</i>            |                            |                                                                        |
| Gilead Sciences                                                                                                 | Grant / Contract           | Self                                                                   |
| <i>Recipient Name:</i> Susanna Naggie<br><i>Grant / Contract Description:</i><br><i>Additional Information:</i> |                            | <i>Recipient Type:</i> Institution<br><i>Grant / Contract Purpose:</i> |
| NIH Office of the Director                                                                                      | Grant / Contract           | Self                                                                   |
| <i>Recipient Name:</i> Susanna Naggie<br><i>Grant / Contract Description:</i><br><i>Additional Information:</i> |                            | <i>Recipient Type:</i> Institution<br><i>Grant / Contract Purpose:</i> |
| Pardes                                                                                                          | Consultant                 | Self                                                                   |
| <i>Category:</i> Consultant<br><i>Description:</i><br><i>Additional Information:</i>                            |                            |                                                                        |
| Personal Health Insights                                                                                        | Data And Safety Monitoring | Self                                                                   |
| <i>Category:</i> Data And Safety Monitoring<br><i>Description:</i><br><i>Additional Information:</i>            |                            |                                                                        |
| Silverback                                                                                                      | Consultant                 | Self                                                                   |
| <i>Category:</i> Consultant<br><i>Description:</i> No financial payments<br><i>Additional Information:</i>      |                            |                                                                        |
| Vir Bio                                                                                                         | Consultant                 | Self                                                                   |
| <i>Category:</i> Consultant<br><i>Description:</i><br><i>Additional Information:</i>                            |                            |                                                                        |



| Entity                         | Type  | Interest Held By |
|--------------------------------|-------|------------------|
| Vir Bio                        | Stock | Self             |
| <i>Additional Information:</i> |       |                  |

## Additional Questions

1. **Are there other relationships or activities that readers could perceive to have influenced, or that give the appearance of potentially influencing, what you wrote in the submitted work?**

No.

2. **What is the manuscript title?**

Inhaled Fluticasone for Outpatient Treatment of Covid-19

3. **Are you the corresponding author?**

Yes.

- a. **Please list the other authors' names here.**

David R. Boulware, MD, MPH,<sup>1</sup> Christopher J. Lindsell, PhD,<sup>2</sup> Thomas G. Stewart, PhD,<sup>2\*</sup> Adrian F. Hernandez, MD, MHS,<sup>3</sup> Sean Collins, MD, MSci,<sup>2</sup> Matthew William McCarthy, MD,<sup>4</sup> Dushyantha Jayaweera, MD,<sup>5</sup> Nina Gentile, MD,<sup>6</sup> Mario Castro, MD, MPH,<sup>7</sup> Mark Sulkowski, MD,<sup>8</sup> Kathleen McTigue, MD, MPH, MS,<sup>9</sup> G. Michael Felker, MD, MHS,<sup>3</sup> Adit A. Ginde, MD, MPH,<sup>10</sup> Sarah E. Dunsmore, PhD,<sup>11</sup> Stacey J. Adam, PhD,<sup>12</sup> Allison DeLong, BS,<sup>3</sup> George Hanna, MD,<sup>13</sup> April Remaly, BA,<sup>3</sup> Florence Thicklin,<sup>14</sup> Rhonda Wilder, MS,<sup>3</sup> Sybil Wilson, RN,<sup>3</sup> Elizabeth Shenkman, PhD,<sup>15</sup> Susanna Naggie, MD, MHS<sup>3</sup>

## Certification

I certify that the information provided in this disclosure is complete and accurate.

# April Remaly

**Discloser Identifier:** 1088386

**Disclosure Purpose:** 22-09421

## Summary of Interests

I do not have any interests to disclose at this time.

## Additional Questions

1. **Are there other relationships or activities that readers could perceive to have influenced, or that give the appearance of potentially influencing, what you wrote in the submitted work?**

No.

2. **What is the manuscript title?**

The Effects of Fluticasone on patients with mild to moderate COVID.

3. **Are you the corresponding author?**

No.

## Certification

I certify that the information provided in this disclosure is complete and accurate.

Elizabeth Shenkman

**Discloser Identifier:** 1010394

**Disclosure Purpose:** 22-09421

## Summary of Interests

I do not have any interests to disclose at this time.

## Additional Questions

1. **Are there other relationships or activities that readers could perceive to have influenced, or that give the appearance of potentially influencing, what you wrote in the submitted work?**

No.

2. **What is the manuscript title?**

Inhaled Fluticasone for Outpatient Treatment of Covid-19

3. **Are you the corresponding author?**

No.

## Certification

I certify that the information provided in this disclosure is complete and accurate.

Thomas Stewart

Discloser Identifier: 1088373

Disclosure Purpose: 22-09421

## Summary of Interests

### Company or Organization

| Entity                                                                                                                                                                | Type                       | Interest Held By |
|-----------------------------------------------------------------------------------------------------------------------------------------------------------------------|----------------------------|------------------|
| Eli Lilly and Company                                                                                                                                                 | Data And Safety Monitoring | Self             |
| <i>Category:</i> Data And Safety Monitoring<br><i>Description:</i> Independent data monitoring committee member for clinical trials<br><i>Additional Information:</i> |                            |                  |

## Additional Questions

1. **Are there other relationships or activities that readers could perceive to have influenced, or that give the appearance of potentially influencing, what you wrote in the submitted work?**

No.

2. **What is the manuscript title?**

Inhaled Fluticasone for Outpatient Treatment of Covid-19

3. **Are you the corresponding author?**

No.

## Certification

I certify that the information provided in this disclosure is complete and accurate.

Discloser Identifier: 456956

Disclosure Purpose: 22-09421

## Summary of Interests

### Company or Organization

| Entity                                                                                                                                                  | Type       | Interest Held By |
|---------------------------------------------------------------------------------------------------------------------------------------------------------|------------|------------------|
| AbbVie                                                                                                                                                  | Consultant | Self             |
| <i>Category:</i> Consultant<br><i>Description:</i> Scientific advisory board related to hepatitis C and other viruses<br><i>Additional Information:</i> |            |                  |
| Aligos                                                                                                                                                  | Consultant | Self             |
| <i>Category:</i> Consultant<br><i>Description:</i> Scientific advisor related to hepatitis B<br><i>Additional Information:</i>                          |            |                  |
| Antios                                                                                                                                                  | Consultant | Self             |
| <i>Category:</i> Consultant<br><i>Description:</i> Scientific advisor related to hepatitis B<br><i>Additional Information:</i>                          |            |                  |
| Assembly Bioscience                                                                                                                                     | Consultant | Self             |
| <i>Category:</i> Consultant<br><i>Description:</i> Scientific advisor related to hepatitis B<br><i>Additional Information:</i>                          |            |                  |
| Atea Pharmaceutical                                                                                                                                     | Consultant | Self             |
| <i>Category:</i> Consultant<br><i>Description:</i> Scientific advisor related to COVID-19 and hepatitis C<br><i>Additional Information:</i>             |            |                  |
| Gilead Sciences (aka Gilead Foundation)                                                                                                                 | Consultant | Self             |
| <i>Category:</i> Consultant<br><i>Description:</i> Scientific advisor related to hepatitis C and other viruses<br><i>Additional Information:</i>        |            |                  |
| GlaxoSmithKline                                                                                                                                         | Consultant | Self             |
| <i>Category:</i> Consultant<br><i>Description:</i> Scientific advisor related to hepatitis B<br><i>Additional Information:</i>                          |            |                  |
| Precision Biosciences                                                                                                                                   | Consultant | Self             |
| <i>Category:</i> Consultant<br><i>Description:</i> Scientific advisor related to hepatitis B<br><i>Additional Information:</i>                          |            |                  |

| Entity                                                                                                                                     | Type       | Interest Held By |
|--------------------------------------------------------------------------------------------------------------------------------------------|------------|------------------|
| ViiV Healthcare                                                                                                                            | Consultant | Self             |
| <i>Category:</i> Consultant<br><i>Description:</i> Scientific advisor related to fatty liver disease/HIV<br><i>Additional Information:</i> |            |                  |
| WILEY                                                                                                                                      | Other      | Self             |
| <i>Category:</i> Other<br><i>Description:</i> Editorial Board, Journal of Viral Hepatitis<br><i>Additional Information:</i>                |            |                  |

## Additional Questions

1. **Are there other relationships or activities that readers could perceive to have influenced, or that give the appearance of potentially influencing, what you wrote in the submitted work?**

No.

2. **What is the manuscript title?**

Inhaled Fluticasone for Outpatient Treatment of Covid-19

3. **Are you the corresponding author?**

No.

## Certification

I certify that the information provided in this disclosure is complete and accurate.

Florence Thicklin

**Discloser Identifier:** 1088387

**Disclosure Purpose:** 22-09421

## Summary of Interests

I do not have any interests to disclose at this time.

## Additional Questions

1. **Are there other relationships or activities that readers could perceive to have influenced, or that give the appearance of potentially influencing, what you wrote in the submitted work?**

No.

2. **What is the manuscript title?**

Inhaled Fluticasone for Outpatient Treatment of Covid-19

3. **Are you the corresponding author?**

No.

## Certification

I certify that the information provided in this disclosure is complete and accurate.

Rhonda Wilder

**Discloser Identifier:** 817309

**Disclosure Purpose:** 22-09421

## Summary of Interests

I do not have any interests to disclose at this time.

## Additional Questions

1. **Are there other relationships or activities that readers could perceive to have influenced, or that give the appearance of potentially influencing, what you wrote in the submitted work?**

No.

2. **What is the manuscript title?**

Inhaled Fluticasone for Outpatient Treatment of Covid-19: A Decentralized, Placebo-controlled, Randomized, Platform Clinical Trial

3. **Are you the corresponding author?**

No.

## Certification

I certify that the information provided in this disclosure is complete and accurate.



Sybil Wilson

**Discloser Identifier:** 1088388

**Disclosure Purpose:** 22-09421

## Summary of Interests

I do not have any interests to disclose at this time.

## Additional Questions

1. **Are there other relationships or activities that readers could perceive to have influenced, or that give the appearance of potentially influencing, what you wrote in the submitted work?**

No.

2. **What is the manuscript title?**

Inhaled Fluticasone for Outpatient Treatment of Covid-19: A Decentralized, Placebo-controlled, Randomized, Platform Clinical Trial

3. **Are you the corresponding author?**

No.

## Certification

I certify that the information provided in this disclosure is complete and accurate.
